# Supplementary material for: Body Mass Index Trajectories, Weight Gain, and Risks of Liver and Biliary Tract Cancers
Source: PubMed Central journal article supplement — JNCI Cancer Spectr. 2022 Aug 12;6(4):pkac056. doi: 10.1093/jncics/pkac056 (PMC9406603; doi:10.1093/jncics/pkac056), 2022-08-12
Supplement: pkac056_supplementary_data.pdf [file pkac056_supplementary_data.pdf]

**Supplementary Table 1.** Demographic and lifestyle characteristics of participants with available dietary data in the Prostate, Lung, Colorectal and Ovarian (PLCO) Cancer Screening Trial<sup>a</sup>

| Weight change across the adult life course       | age 20y to 50y |                        |                      |                       |                | age 20y to study enrollment |                        |                      |                       |                |
|--------------------------------------------------|----------------|------------------------|----------------------|-----------------------|----------------|-----------------------------|------------------------|----------------------|-----------------------|----------------|
|                                                  | Loss<br>≤-5 kg | Stable<br>-5 to < 5 kg | Gain<br>5 to < 10 kg | Gain<br>10 to < 20 kg | Gain<br>≥20 kg | Loss<br>≤-5 kg              | Stable<br>-5 to < 5 kg | Gain<br>5 to < 10 kg | Gain<br>10 to < 20 kg | Gain<br>≥20 kg |
| No. of participants                              | 3104           | 37738                  | 34661                | 41614                 | 21805          | 3536                        | 24414                  | 24627                | 44536                 | 41809          |
| Age at study enrollment, years                   | 62.3 (5.2)     | 63.2 (5.3)             | 62.9 (5.3)           | 62.3 (5.3)            | 61.0 (5.1)     | 63.3 (5.4)                  | 62.9 (5.4)             | 62.7 (5.3)           | 62.5 (5.3)            | 62.2 (5.2)     |
| Sex                                              |                |                        |                      |                       |                |                             |                        |                      |                       |                |
| Men                                              | 47.5           | 45.1                   | 45.6                 | 53.4                  | 55.0           | 55.8                        | 50.3                   | 50.1                 | 50.8                  | 46.2           |
| Women                                            | 51.0           | 54.0                   | 51.4                 | 46.3                  | 44.9           | 43.1                        | 48.5                   | 49.0                 | 49.1                  | 51.5           |
| Race and ethnicity                               |                |                        |                      |                       |                |                             |                        |                      |                       |                |
| Hispanic                                         | 1.9            | 1.5                    | 1.7                  | 2.0                   | 2.0            | 1.7                         | 1.5                    | 1.8                  | 2.0                   | 2.1            |
| Non-Hispanic Black                               | 5.5            | 3.2                    | 3.2                  | 4.5                   | 7.7            | 5.9                         | 3.3                    | 4.3                  | 5.4                   | 8.4            |
| Non-Hispanic White                               | 87.2           | 89.0                   | 89.0                 | 88.9                  | 88.0           | 88.0                        | 89.3                   | 88.8                 | 88.7                  | 87.0           |
| Other <sup>b</sup>                               | 5.5            | 6.4                    | 6.1                  | 4.7                   | 2.3            | 4.5                         | 6.1                    | 5.2                  | 3.9                   | 2.7            |
| Hypertension                                     | 27.8           | 24.3                   | 31.2                 | 37.8                  | 48.7           | 29.1                        | 23.7                   | 27.1                 | 32.7                  | 45.7           |
| Diverticulitis                                   | 5.9            | 5.9                    | 6.9                  | 7.2                   | 7.4            | 5.6                         | 5.6                    | 6.2                  | 6.8                   | 7.8            |
| Diabetes mellitus                                | 6.5            | 3.4                    | 5.1                  | 8.4                   | 17.9           | 9.1                         | 4.7                    | 5.1                  | 6.6                   | 11.7           |
| Liver cirrhosis <sup>c</sup>                     | 4.5            | 3.5                    | 3.6                  | 3.7                   | 3.8            | 4.4                         | 3.7                    | 3.3                  | 3.7                   | 3.7            |
| Family history of liver cancer                   | 2.1            | 2.1                    | 2.0                  | 2.1                   | 1.9            | 1.8                         | 2.1                    | 1.9                  | 2.0                   | 2.1            |
| Family history of biliary tract cancer           | 0.3            | 0.2                    | 0.2                  | 0.2                   | 0.3            | 0.3                         | 0.2                    | 0.3                  | 0.2                   | 0.3            |
| Gall bladder stones or inflammation <sup>c</sup> | 10.7           | 8.3                    | 10.3                 | 12.1                  | 16.4           | 10.1                        | 7.4                    | 8.6                  | 10.8                  | 15.7           |
| Alcohol intake                                   |                |                        |                      |                       |                |                             |                        |                      |                       |                |
| Never                                            | 7.2            | 9.6                    | 9.9                  | 9.7                   | 10.5           | 8.6                         | 9.6                    | 9.2                  | 9.6                   | 10.8           |
| Former                                           | 17.1           | 12.6                   | 12.9                 | 15.1                  | 18.9           | 16.5                        | 13.2                   | 12.3                 | 13.7                  | 17.4           |
| Current                                          | 72.2           | 74.1                   | 73.7                 | 71.4                  | 66.1           | 71.5                        | 73.6                   | 75.2                 | 73.1                  | 67.6           |
| Unknown                                          | 3.5            | 3.7                    | 3.5                  | 3.8                   | 4.5            | 3.4                         | 3.6                    | 3.3                  | 3.6                   | 4.2            |
| Education                                        |                |                        |                      |                       |                |                             |                        |                      |                       |                |
| Less than high school                            | 8.6            | 6.1                    | 6.7                  | 7.6                   | 8.9            | 9.1                         | 5.8                    | 5.7                  | 6.8                   | 9.3            |
| High school                                      | 21.6           | 21.2                   | 22.8                 | 24.0                  | 24.2           | 21.5                        | 19.6                   | 21.4                 | 23.8                  | 24.9           |
| Post high school training other than college     | 12.6           | 11.7                   | 12.2                 | 13.2                  | 13.7           | 12.5                        | 11.4                   | 11.9                 | 12.8                  | 13.5           |
| Some college                                     | 20.7           | 20.7                   | 21.6                 | 22.3                  | 23.4           | 19.4                        | 20.4                   | 20.8                 | 21.9                  | 23.3           |
| College graduate                                 | 16.9           | 18.8                   | 17.4                 | 16.2                  | 15.3           | 17.4                        | 19.9                   | 18.9                 | 16.8                  | 14.5           |
| Postgraduate                                     | 19.6           | 21.5                   | 19.3                 | 16.7                  | 14.5           | 20.1                        | 22.9                   | 21.3                 | 17.9                  | 14.5           |
| Smoking status                                   |                |                        |                      |                       |                |                             |                        |                      |                       |                |
| Never                                            | 37.8           | 47.7                   | 47.3                 | 45.5                  | 44.3           | 38.5                        | 48.5                   | 48.4                 | 46.3                  | 44.2           |
| Former                                           | 20.1           | 12.1                   | 10.2                 | 9.6                   | 9.1            | 22.8                        | 14.5                   | 11.0                 | 9.8                   | 7.9            |
| Current                                          | 42.1           | 40.2                   | 42.5                 | 44.9                  | 46.6           | 38.7                        | 37.0                   | 40.6                 | 43.9                  | 47.9           |
| Job status                                       |                |                        |                      |                       |                |                             |                        |                      |                       |                |
| Homemaker                                        | 9.5            | 12.2                   | 11.8                 | 10.6                  | 9.8            | 8.1                         | 11.0                   | 11.6                 | 11.2                  | 11.4           |
| Working                                          | 41.2           | 37.5                   | 39.1                 | 40.9                  | 44.3           | 37.6                        | 39.5                   | 40.8                 | 40.5                  | 39.6           |

|                                            |             |             |             |             |             |             |             |             |             |             |
|--------------------------------------------|-------------|-------------|-------------|-------------|-------------|-------------|-------------|-------------|-------------|-------------|
| Unemployed                                 | 1.6         | 0.9         | 0.9         | 1.1         | 1.3         | 1.6         | 1.0         | 0.8         | 1.0         | 1.2         |
| Retired                                    | 40.1        | 45.4        | 44.4        | 43.1        | 38.0        | 45.7        | 44.3        | 43.1        | 43.3        | 42.0        |
| Extended sick leave and Disabled           | 4.9         | 1.7         | 1.7         | 2.2         | 4.4         | 4.7         | 0.1         | 0.2         | 0.2         | 0.3         |
| Other                                      | 2.7         | 2.3         | 2.1         | 2.1         | 2.2         | 2.3         | 2.4         | 2.1         | 2.2         | 2.1         |
| HEI-2010 score                             | 65.2 (11.8) | 66.7 (11.0) | 54.8 (10.6) | 64.4 (10.7) | 63.1 (10.5) | 65.4 (12.1) | 67.0 (11.1) | 66.4 (10.7) | 65.1 (10.6) | 63.5 (10.5) |
| Coffee, g/day                              | 809 (95)    | 647 (70)    | 627 (71)    | 631 (73)    | 597 (77)    | 782 (90)    | 667 (87)    | 634 (77)    | 633 (74)    | 601 (76)    |
| Aspirin use <sup>d</sup>                   | 45.7        | 45.1        | 46.8        | 48.2        | 49.2        | 46.3        | 45.1        | 46.5        | 47.2        | 48.6        |
| BMI at age 20, kg/m <sup>2</sup>           | 27.2 (4.8)  | 22.3 (2.8)  | 21.9 (2.6)  | 21.6 (2.8)  | 21.9 (3.3)  | 26.8 (4.8)  | 22.6 (2.9)  | 22.0 (2.6)  | 21.7 (2.7)  | 21.6 (3.0)  |
| BMI at age 50, kg/m <sup>2</sup>           | 23.3 (3.7)  | 23.0 (2.8)  | 24.6 (2.6)  | 26.5 (2.9)  | 31.5 (5.0)  | 24.5 (4.4)  | 23.5 (3.4)  | 24.3 (3.1)  | 25.5 (3.3)  | 28.5 (4.8)  |
| BMI at study enrollment, kg/m <sup>2</sup> | 24.7 (4.6)  | 24.3 (3.5)  | 26.3 (3.5)  | 28.3 (3.9)  | 32.3 (5.6)  | 23.0 (3.9)  | 23.2 (2.9)  | 24.7 (2.6)  | 26.8 (2.8)  | 31.9 (4.8)  |

<sup>a</sup>All data reported as percentage (%) or mean (SD), unless noted otherwise. BMI = body mass index; HEI-2010 = Healthy Eating Index-2010; SD = standard deviation.

<sup>b</sup>"Other" race category includes Asian, Pacific Islander, American Indian, and unknown.

<sup>c</sup>Variables were self-reported.

<sup>d</sup>Aspirin use for more than 12 months.

**Supplementary Table 2.** Hazard ratios and 95% confidence intervals for incident liver and biliary tract cancers according to body mass index in a sub-cohort with available dietary data in the Prostate, Lung, Colorectal and Ovarian (PLCO) Cancer Screening Trial

| Model                                                           | BMI category (kg/m <sup>2</sup> ) |                 |                  |                  | BMI (per 5 kg/m <sup>2</sup> ) <sup>b</sup> |
|-----------------------------------------------------------------|-----------------------------------|-----------------|------------------|------------------|---------------------------------------------|
|                                                                 | BMI < 18.5                        | BMI 18.5 to <25 | BMI 25 to <30    | BMI ≥30          |                                             |
| <b>Liver cancer</b>                                             |                                   |                 |                  |                  |                                             |
| BMI, age 20y, kg/m <sup>2</sup>                                 |                                   |                 |                  |                  |                                             |
| No. of cases/person-years                                       | 9/144,825                         | 66/1,370,974    | 19/232,655       | 3/30,130         | -                                           |
| Age-adjusted HR (95% CI)                                        | 1.29 (0.64-2.59)                  | 1 (reference)   | 1.79 (1.07-2.99) | 2.29 (0.72-7.32) | 1.40 (1.05-1.86)                            |
| MV, HR (95% CI) <sup>a</sup>                                    | 1.04 (0.56-1.94)                  | 1 (reference)   | 1.35 (0.92-1.99) | 2.54 (1.18-5.46) | 1.37 (1.10-1.72)                            |
| MV, HR (95% CI) <sup>b</sup>                                    | 1.28 (0.64-2.61)                  | 1 (reference)   | 1.29 (0.76-2.17) | 1.56 (0.48-5.05) | 1.14 (0.83-1.55)                            |
| MV, HR (95% CI) <sup>c</sup>                                    | 1.30 (0.64-2.63)                  | 1 (reference)   | 1.29 (0.76-2.18) | 1.54 (0.47-5.00) | 1.13 (0.83-1.55)                            |
| MV+ Average BMI during age 50y to study enrollment, HR (95% CI) | 1.20 (0.64-2.25)                  | 1 (reference)   | 0.99 (0.65-1.50) | 1.60 (0.73-3.54) | 1.37 (1.10-1.72)                            |
| <sup>d</sup>                                                    |                                   |                 |                  |                  |                                             |
| BMI, age 50y, kg/m <sup>2</sup>                                 |                                   |                 |                  |                  |                                             |
| No. of cases/person-years                                       | 0/12,565                          | 36/844,164      | 36/692,256       | 25/229,599       | -                                           |
| Age-adjusted HR (95% CI)                                        | -                                 | 1 (reference)   | 1.29 (0.81-2.06) | 3.05 (1.81-5.13) | 1.49 (1.25-1.79)                            |
| MV, HR (95% CI) <sup>a</sup>                                    | -                                 | 1 (reference)   | 1.40 (0.98-2.01) | 2.58 (1.69-3.96) | 1.45 (1.24-1.70)                            |
| MV, HR (95% CI) <sup>b</sup>                                    | -                                 | 1 (reference)   | 0.93 (0.57-1.51) | 1.88 (1.06-3.32) | 1.28 (1.02-1.60)                            |
| MV, HR (95% CI) <sup>c</sup>                                    | -                                 | 1 (reference)   | 0.93 (0.57-1.50) | 1.87 (1.05-3.32) | 1.28 (1.02-1.60)                            |
| BMI, age at study enrollment                                    |                                   |                 |                  |                  |                                             |
| No. of cases/person-years                                       | 0/10,549                          | 28/603,197      | 41/764,236       | 28/400,602       | -                                           |
| Age-adjusted HR (95% CI)                                        | -                                 | 1 (reference)   | 1.17 (0.72-1.90) | 1.62 (0.95-2.74) | 1.17 (0.96-1.42)                            |
| MV, HR (95% CI) <sup>a</sup>                                    | 1.18 (0.16-8.64)                  | 1 (reference)   | 1.14 (0.78-1.68) | 1.91 (1.26-2.89) | 1.32 (1.14-1.54)                            |
| MV, HR (95% CI) <sup>b</sup>                                    | -                                 | 1 (reference)   | 0.91 (0.55-1.49) | 1.16 (0.66-2.06) | 1.03 (0.82-1.29)                            |
| MV, HR (95% CI) <sup>c</sup>                                    | -                                 | 1 (reference)   | 0.90 (0.55-1.48) | 1.15 (0.65-2.04) | 1.03 (0.82-1.29)                            |
| Average BMI during age 20 to 50y                                |                                   |                 |                  |                  |                                             |
| No. of cases/person-years                                       | 0/21,973                          | 58/1,214,666    | 30/461,119       | 9/80,825         | -                                           |
| Age-adjusted HR (95% CI)                                        | -                                 | 1 (reference)   | 1.47 (0.94-2.29) | 2.75 (1.35-5.61) | 1.64 (1.28-2.10)                            |
| MV, HR (95% CI) <sup>a</sup>                                    | -                                 | 1 (reference)   | 1.46 (1.05-2.04) | 2.29 (1.29-4.06) | 1.58 (1.29-1.95)                            |
| MV, HR (95% CI) <sup>b</sup>                                    | -                                 | 1 (reference)   | 1.09 (0.68-1.72) | 1.72 (0.81-3.62) | 1.30 (0.97-1.74)                            |

|                                                |                  |               |                  |                  |                  |
|------------------------------------------------|------------------|---------------|------------------|------------------|------------------|
| MV, HR (95% CI) <sup>c</sup>                   | -                | 1 (reference) | 1.08 (0.68-1.72) | 1.70 (0.81-3.61) | 1.30 (0.97-1.74) |
| Average BMI during age 20y to study enrollment |                  |               |                  |                  |                  |
| No. of cases/person-years                      | 0/13,234         | 49/1,063,962  | 42/585,090       | 6/116,298        | -                |
| Age-adjusted HR (95% CI)                       | -                | 1 (reference) | 1.62 (1.07-2.44) | 1.26 (0.53-2.95) | 1.35 (1.03-1.77) |
| MV, HR (95% CI) <sup>a</sup>                   | -                | 1 (reference) | 1.56 (1.13-2.16) | 1.86 (1.06-3.26) | 1.50 (1.22-1.85) |
| MV, HR (95% CI) <sup>b</sup>                   | -                | 1 (reference) | 1.28 (0.83-1.97) | 0.86 (0.35-2.07) | 1.09 (0.81-1.48) |
| MV, HR (95% CI) <sup>c</sup>                   | -                | 1 (reference) | 1.27 (0.83-1.96) | 0.85 (0.35-2.06) | 1.09 (0.80-1.48) |
| Average BMI during age 50y to study enrollment |                  |               |                  |                  |                  |
| No. of cases/person-years                      | 0/8,317          | 29/702,346    | 46/770,876       | 22/297,045       | -                |
| Age-adjusted HR (95% CI)                       | -                | 1 (reference) | 1.48 (0.93-2.36) | 2.02 (1.16-3.54) | 1.36 (1.11-1.67) |
| MV, HR (95% CI) <sup>a</sup>                   | -                | 1 (reference) | 1.34 (0.92-1.93) | 2.35 (1.54-3.60) | 1.44 (1.15-1.80) |
| MV, HR (95% CI) <sup>b</sup>                   | -                | 1 (reference) | 1.11 (0.69-1.80) | 1.31 (0.71-2.42) | 1.16 (0.92-1.48) |
| MV, HR (95% CI) <sup>c</sup>                   | -                | 1 (reference) | 1.10 (0.68-1.78) | 1.30 (0.71-2.41) | 1.16 (0.91-1.48) |
| Biliary tract cancer                           |                  |               |                  |                  |                  |
| BMI, age 20y, kg/m <sup>2</sup>                |                  |               |                  |                  |                  |
| No. of cases/person-years                      | 6/144,825        | 67/1,370,974  | 14/232,655       | 3/30,130         | -                |
| Age-adjusted HR (95% CI)                       | 0.84 (0.36-1.95) | 1 (reference) | 1.28 (0.71-2.27) | 2.17 (0.68-6.91) | 1.22 (0.88-1.68) |
| MV, HR (95% CI) <sup>c</sup>                   | 0.82 (0.36-1.91) | 1 (reference) | 1.23 (0.68-2.24) | 2.02 (0.63-6.52) | 1.20 (0.86-1.67) |
| MV, HR (95% CI) <sup>e</sup>                   | 0.90 (0.47-1.72) | 1 (reference) | 1.32 (0.83-2.08) | 2.15 (0.87-5.31) | 1.28 (0.99-1.64) |
| MV, HR (95% CI) <sup>f</sup>                   | 0.82 (0.35-1.90) | 1 (reference) | 1.24 (0.68-2.25) | 2.03 (0.63-6.55) | 1.20 (0.86-1.68) |
| BMI, age 50y, kg/m <sup>2</sup>                |                  |               |                  |                  |                  |
| No. of cases/person-years                      | 0/12,565         | 36/44,164     | 38/692,256       | 16/229,599       | -                |
| Age-adjusted HR (95% CI)                       | -                | 1 (reference) | 1.34 (0.85-2.12) | 1.83 (1.01-3.33) | 1.26 (1.02-1.57) |
| MV, HR (95% CI) <sup>c</sup>                   | -                | 1 (reference) | 1.34 (0.83-2.17) | 1.90 (1.00-3.59) | 1.28 (1.01-1.62) |
| MV, HR (95% CI) <sup>e</sup>                   | 1.13 (0.16-8.18) | 1 (reference) | 1.46 (0.99-2.14) | 2.15 (1.33-3.47) | 1.35 (1.14-1.59) |
| MV, HR (95% CI) <sup>f</sup>                   | -                | 1 (reference) | 1.34 (0.83-2.17) | 1.89 (1.00-3.59) | 1.28 (1.01-1.62) |
| BMI, age at study enrollment                   |                  |               |                  |                  |                  |
| No. of cases/person-years                      | 0/10,549         | 24/603,197    | 36/764,236       | 30/400,602       | -                |
| Age-adjusted HR (95% CI)                       | -                | 1 (reference) | 1.19 (0.71-2.00) | 1.96 (1.14-3.36) | 1.14 (0.93-1.40) |

|                                                |                  |               |                  |                  |                  |
|------------------------------------------------|------------------|---------------|------------------|------------------|------------------|
| MV, HR (95% CI) <sup>c</sup>                   | -                | 1 (reference) | 1.21 (0.71-2.06) | 2.12 (1.19-3.76) | 1.16 (0.93-1.45) |
| MV, HR (95% CI) <sup>e</sup>                   | -                | 1 (reference) | 1.24 (0.81-1.90) | 2.20 (1.41-3.43) | 1.24 (1.06-1.45) |
| MV, HR (95% CI) <sup>f</sup>                   | -                | 1 (reference) | 1.21 (0.71-2.06) | 2.12 (1.19-3.77) | 1.16 (0.93-1.45) |
| Average BMI during age 20 to 50y               |                  |               |                  |                  |                  |
| No. of cases/person-years                      | 1/21,973         | 59/1,214,666  | 26/461,119       | 4/80,825         | -                |
| Age-adjusted HR (95% CI)                       | 0.93 (0.12-6.71) | 1 (reference) | 1.22 (0.76-1.94) | 1.12 (0.40-3.12) | 1.33 (0.99-1.78) |
| MV, HR (95% CI) <sup>c</sup>                   | 0.93 (0.13-6.74) | 1 (reference) | 1.20 (0.74-1.95) | 1.08 (0.38-3.06) | 1.34 (0.98-1.83) |
| MV, HR (95% CI) <sup>e</sup>                   | 1.23 (0.30-5.03) | 1 (reference) | 1.32 (0.91-1.94) | 2.22 (1.20-4.11) | 1.44 (1.22-1.69) |
| MV, HR (95% CI) <sup>f</sup>                   | 0.93 (0.13-6.74) | 1 (reference) | 1.21 (0.74-1.96) | 1.08 (0.38-3.06) | 1.34 (0.98-1.83) |
| Average BMI during age 20y to study enrollment |                  |               |                  |                  |                  |
| No. of cases/person-years                      | 0/13,234         | 49/1,063,962  | 35/585,090       | 6/116,298        | -                |
| Age-adjusted HR (95% CI)                       | -                | 1 (reference) | 1.32 (0.86-2.05) | 1.20 (0.51-2.81) | 1.24 (0.93-1.66) |
| MV, HR (95% CI) <sup>c</sup>                   | -                | 1 (reference) | 1.34 (0.86-2.11) | 1.21 (0.50-2.91) | 1.25 (0.92-1.70) |
| MV, HR (95% CI) <sup>e</sup>                   | 1.01 (0.14-7.31) | 1 (reference) | 1.38 (0.96-1.98) | 2.01 (1.14-3.54) | 1.37 (1.09-1.71) |
| MV, HR (95% CI) <sup>f</sup>                   | -                | 1 (reference) | 1.35 (0.86-2.12) | 1.21 (0.51-2.92) | 1.25 (0.92-1.70) |
| Average BMI during age 50y to study enrollment |                  |               |                  |                  |                  |
| No. of cases/person-years                      | 0/8,317          | 29/702,346    | 42/770,876       | 19/297,045       | -                |
| Age-adjusted HR (95% CI)                       | -                | 1 (reference) | 1.33 (0.83-2.14) | 1.67 (0.93-2.99) | 1.22 (0.97-1.53) |
| MV, HR (95% CI) <sup>c</sup>                   | -                | 1 (reference) | 1.35 (0.82-2.20) | 1.74 (0.93-3.25) | 1.24 (0.98-1.59) |
| MV, HR (95% CI) <sup>e</sup>                   | -                | 1 (reference) | 1.49 (1.00-2.20) | 1.91 (1.18-3.07) | 1.33 (1.12-1.58) |
| MV, HR (95% CI) <sup>f</sup>                   | -                | 1 (reference) | 1.35 (0.82-2.20) | 1.74 (0.93-3.25) | 1.24 (0.98-1.58) |

<sup>a</sup>Models were adjusted for age, sex, center, race and ethnicity, randomization arm, education, job status, aspirin use more than 12 months, smoking status, and family history of liver cancer. BMI = body mass index; CI = confidence interval; HR = hazard ratio.

<sup>b</sup>Models were adjusted for age, sex, center, race and ethnicity, randomization arm, education, job status, aspirin use more than 12 months, smoking status, diabetes mellitus, hypertension, diverticulitis, liver cirrhosis, family history of liver cancer, the Healthy Eating Index-2010 scores, and alcohol.

<sup>c</sup>Models were adjusted for age, sex, center, race and ethnicity, randomization arm, education, job status, aspirin use more than 12 months, smoking status, diabetes mellitus, hypertension, diverticulitis, liver cirrhosis, gallbladder stones or inflammation, the Healthy Eating Index-2010 scores, and alcohol.

<sup>d</sup>Models were adjusted for age, sex, center, race and ethnicity, randomization arm, education, job status, aspirin use more than 12 months, smoking status, diabetes mellitus, hypertension, diverticulitis, liver cirrhosis, family history of liver cancer, the Healthy Eating Index-2010 scores, alcohol, and average BMI during age 50y to study enrollment.

<sup>e</sup>Models were adjusted for age, sex, center, race and ethnicity, randomization arm, education, job status, aspirin use more than 12 months, smoking status, and family history of biliary tract cancer.

<sup>f</sup>Models were adjusted for age, sex, center, race and ethnicity, randomization arm, education, job status, aspirin use more than 12 months, smoking status, diabetes mellitus, hypertension, liver cirrhosis, gallbladder stones or inflammation, and family history of biliary tract cancer, the Healthy Eating Index-2010 scores, and alcohol.

<sup>g</sup>Models were adjusted for age, sex, center, race and ethnicity, randomization arm, education, job status, aspirin use more than 12 months, smoking status, diabetes mellitus, hypertension, liver cirrhosis, gallbladder stones or inflammation, and family history of biliary tract cancer, the Healthy Eating Index-2010 scores, alcohol, and average BMI during age 50y to study enrollment.

<sup>h</sup>The trend tests were conducted using BMI as a continuous variable.

**Supplementary Table 3.** Hazard ratios and 95% confidence intervals for incident liver and biliary tract cancers according to timing of being first overweight in a sub-cohort with available dietary data in the Prostate, Lung, Colorectal and Ovarian (PLCO) Cancer Screening Trial

| Model                        | Time when body mass index first exceeded 25 kg/m <sup>2</sup> |                  |                  |                            |
|------------------------------|---------------------------------------------------------------|------------------|------------------|----------------------------|
|                              | Never                                                         | By age 20y       | By age 50y       | By age at study enrollment |
| <b>Liver cancer</b>          |                                                               |                  |                  |                            |
| No. of cases                 | 22                                                            | 22               | 39               | 14                         |
| Person-years                 | 545,121                                                       | 262,785          | 679,922          | 290,756                    |
| MV, HR (95% CI) <sup>a</sup> | 1 (reference)                                                 | 2.03 (1.26-3.28) | 1.63 (1.06-2.49) | 1.34 (0.78-2.29)           |
| MV, HR (95% CI) <sup>b</sup> | 1 (reference)                                                 | 1.31 (0.70-2.47) | 1.02 (0.59-1.77) | 1.06 (0.54-2.09)           |
| MV, HR (95% CI) <sup>c</sup> | 1 (reference)                                                 | 1.30 (0.69-2.46) | 1.01 (0.58-1.76) | 1.05 (0.53-2.07)           |
| <b>Biliary tract cancer</b>  |                                                               |                  |                  |                            |
| No. of cases                 | 19                                                            | 17               | 38               | 16                         |
| Person-years                 | 545,121                                                       | 262,785          | 679,922          | 290,756                    |
| MV, HR (95% CI) <sup>d</sup> | 1 (reference)                                                 | 1.99 (1.16-3.39) | 1.67 (1.06-2.61) | 1.30 (0.74-2.26)           |
| MV, HR (95% CI) <sup>e</sup> | 1 (reference)                                                 | 1.97 (0.98-3.96) | 1.68 (0.95-3.00) | 1.53 (0.78-3.01)           |
| MV, HR (95% CI) <sup>f</sup> | 1 (reference)                                                 | 1.96 (0.98-3.94) | 1.68 (0.95-3.00) | 1.53 (0.78-2.99)           |

<sup>a</sup>Models were adjusted for age, sex, center, race and ethnicity, randomization arm, education, job status, aspirin use more than 12 months, smoking status, and family history of liver cancer. CI = confidence interval; HR = hazard ratio.

<sup>b</sup>Models were adjusted for age, sex, center, race and ethnicity, randomization arm, job status, aspirin use more than 12 months, smoking status, diabetes mellitus, hypertension, diverticulitis, liver cirrhosis, family history of liver cancer, the Healthy Eating Index-2010 scores, and alcohol.

<sup>c</sup>Models were adjusted for age, sex, center, race and ethnicity, randomization arm, education, job status, aspirin use more than 12 months, smoking status, diabetes mellitus, hypertension, diverticulitis, liver cirrhosis, gallbladder stones or inflammation, the Healthy Eating Index-2010 scores, and alcohol.

<sup>d</sup>Models were adjusted for age, sex, center, race and ethnicity, randomization arm, education, job status, aspirin use more than 12 months, smoking status, and family history of biliary tract cancer.

<sup>e</sup>Models were adjusted for age, sex, center, race and ethnicity, randomization arm, job status, aspirin use more than 12 months, smoking status, diabetes mellitus, hypertension, liver cirrhosis, gallbladder stones or inflammation, family history of biliary tract cancer, the Healthy Eating Index-2010 scores, and alcohol.

**Supplementary Table 4.** Hazard ratios and 95% confidence intervals for incident liver and biliary tract cancers according to weight change in a sub-cohort with available dietary data in the Prostate, Lung, Colorectal and Ovarian (PLCO) Cancer Screening Trial

| Model                                                                    | Loss<br>≤-5 kg     | Stable weight<br>-5 to < 5 kg | Gain<br>5 to < 10 kg | Gain<br>10 to < 20 kg | Gain<br>≥20 kg    | <i>P</i> <sub>trend</sub> <sup>h</sup> |
|--------------------------------------------------------------------------|--------------------|-------------------------------|----------------------|-----------------------|-------------------|----------------------------------------|
| <b>Liver cancer</b>                                                      |                    |                               |                      |                       |                   |                                        |
| Weight change during early-to-mid adulthood (age 20 to 50y)              |                    |                               |                      |                       |                   |                                        |
| No. of cases/person-years                                                | 2/37,985           | 19/495,005                    | 17/452,912           | 33/528,546            | 26/264,135        | -                                      |
| Median (IQR)                                                             | -9.1 (-12.7, -6.8) | 2.2 (0, 4.5)                  | 7.7 (6.8, 9.1)       | 13.6 (11.3, 15.8)     | 24.9 (22.7, 31.7) | -                                      |
| Age-adjusted HR (95% CI)                                                 | 1.47 (0.34-6.34)   | 1 (reference)                 | 0.99 (0.51-1.92)     | 1.73 (0.98-3.05)      | 3.03 (1.66-5.52)  | <0.001                                 |
| MV, HR (95% CI) <sup>a</sup>                                             | 0.60 (0.15-2.51)   | 1 (reference)                 | 0.96 (0.59-1.55)     | 1.60 (1.06-2.43)      | 1.99 (1.25-3.17)  | 0.002                                  |
| MV, HR (95% CI) <sup>b</sup>                                             | 1.15 (0.26-4.97)   | 1 (reference)                 | 0.92 (0.48-1.78)     | 1.39 (0.78-2.47)      | 1.88 (1.00-3.53)  | 0.07                                   |
| MV, HR (95% CI) <sup>c</sup>                                             | 1.14 (0.26-4.95)   | 1 (reference)                 | 0.91 (0.47-1.76)     | 1.38 (0.77-2.46)      | 1.86 (0.99-3.51)  | 0.07                                   |
| MV+BMI at 20 age, HR (95% CI) <sup>d</sup>                               | 0.94 (0.21-4.21)   | 1 (reference)                 | 0.95 (0.49-1.84)     | 1.48 (0.82-2.65)      | 2.02 (1.06-3.83)  | 0.04                                   |
| Weight change across the adult life course (age 20y to study enrollment) |                    |                               |                      |                       |                   |                                        |
| No. of cases/person-years                                                | 2/40,764           | 19/315,334                    | 17/327,537           | 33/578,276            | 26/516,673        | -                                      |
| Median (IQR)                                                             | -9.1 (-12.2, -6.8) | 2.2 (0, 4.1)                  | 7.7 (6.8, 9.1)       | 14.5 (12.2, 17.2)     | 27.2 (22.7, 34.1) | -                                      |
| Age-adjusted HR (95% CI)                                                 | 0.90 (0.21-3.94)   | 1 (reference)                 | 0.80 (0.39-1.62)     | 1.21 (0.68-2.15)      | 1.01 (0.55-1.86)  | 0.54                                   |
| MV, HR (95% CI) <sup>b</sup>                                             | 0.75 (0.17-3.24)   | 1 (reference)                 | 0.79 (0.39-1.61)     | 1.08 (0.60-1.93)      | 0.78 (0.42-1.47)  | 0.72                                   |
| MV, HR (95% CI) <sup>c</sup>                                             | 0.76 (0.18-3.32)   | 1 (reference)                 | 0.79 (0.39-1.60)     | 1.07 (0.60-1.91)      | 0.78 (0.41-1.47)  | 0.71                                   |
| MV+BMI at 20 age, HR (95% CI) <sup>d</sup>                               | 0.67 (0.15-2.98)   | 1 (reference)                 | 0.81 (0.40-1.66)     | 1.12 (0.62-2.02)      | 0.83 (0.43-1.58)  | 0.90                                   |
| Weight change across the adult life course (age 50y to study enrollment) |                    |                               |                      |                       |                   |                                        |
| No. of cases/person-years                                                | 16/117,331         | 52/1,035,174                  | 20/345,663           | 9/219,455             | 0/60,960          |                                        |
| Median (IQR)                                                             | -9.1 (-12.7-6.8)   | 1.8 (0.0-3.6)                 | 6.8 (6.8-9.1)        | 13.6 (11.4-15.9)      | 25.0 (21.8-29.5)  |                                        |
| Age-adjusted HR (95% CI)                                                 | 2.60 (1.48-4.56)   | 1 (reference)                 | 1.09 (0.65-1.82)     | 0.75 (0.37-1.52)      | -                 | <0.001                                 |
| MV, HR (95% CI) <sup>b</sup>                                             | 1.74 (0.97-3.11)   | 1 (reference)                 | 1.11 (0.66-1.87)     | 0.73 (0.36-1.50)      | -                 | 0.006                                  |
| MV, HR (95% CI) <sup>c</sup>                                             | 1.73 (0.96-3.10)   | 1 (reference)                 | 1.11 (0.66-1.88)     | 0.72 (0.35-1.49)      | -                 | 0.006                                  |
| MV+BMI at 20 age, HR (95% CI) <sup>d</sup>                               | 1.71 (0.95-3.07)   | 1 (reference)                 | 1.12 (0.66-1.88)     | 0.73 (0.36-1.51)      | -                 | 0.008                                  |
| <b>Biliary tract cancer</b>                                              |                    |                               |                      |                       |                   |                                        |
| Weight change during early-to-mid adulthood (age 20 to 50y)              |                    |                               |                      |                       |                   |                                        |
| No. of cases/person-years                                                | 1/37,985           | 20/495,005                    | 29/452,912           | 23/528,546            | 17/264,135        | -                                      |

|                                                                          |                    |               |                  |                   |                   |      |
|--------------------------------------------------------------------------|--------------------|---------------|------------------|-------------------|-------------------|------|
| Median (IQR)                                                             | -9.1 (-12.7, -6.8) | 2.2 (0, 4.5)  | 7.7 (6.8, 9.1)   | 13.6 (11.3, 15.8) | 24.9 (22.7, 31.7) | -    |
| Age-adjusted HR (95% CI)                                                 | 0.68 (0.09-5.08)   | 1 (reference) | 1.60 (0.90-2.82) | 1.11 (0.61-2.04)  | 1.77 (0.92-3.40)  | 0.09 |
| MV, HR (95% CI) <sup>e</sup>                                             | 0.37 (0.05-2.67)   | 1 (reference) | 1.23 (0.78-1.96) | 1.12 (0.71-1.78)  | 1.74 (1.05-2.89)  | 0.01 |
| MV, HR (95% CI) <sup>f</sup>                                             | 0.65 (0.09-4.83)   | 1 (reference) | 1.57 (0.89-2.79) | 1.09 (0.59-2.01)  | 1.70 (0.86-3.37)  | 0.12 |
| MV, HR (95% CI) <sup>c</sup>                                             | 0.64 (0.09-4.75)   | 1 (reference) | 1.57 (0.89-2.79) | 1.09 (0.59-2.01)  | 1.71 (0.86-3.38)  | 0.11 |
| MV+BMI at 20 age, HR (95% CI) <sup>g</sup>                               | 0.49 (0.06-3.81)   | 1 (reference) | 1.63 (0.92-2.90) | 1.17 (0.63-2.16)  | 1.83 (0.92-3.63)  | 0.07 |
| Weight change across the adult life course (age 20y to study enrollment) |                    |               |                  |                   |                   |      |
| No. of cases/person-years                                                | 1/40,764           | 20/315,334    | 29/327,537       | 23/578,276        | 17/516,673        | -    |
| Median (IQR)                                                             | -9.1 (-12.2, -6.8) | 2.2 (0, 4.1)  | 7.7 (6.8, 9.1)   | 14.5 (12.2, 17.2) | 27.2 (22.7, 34.1) | -    |
| Age-adjusted HR (95% CI)                                                 | 1.75 (0.50-6.16)   | 1 (reference) | 0.89 (0.41-1.97) | 1.31 (0.68-2.51)  | 1.48 (0.77-2.83)  | 0.43 |
| MV, HR (95% CI) <sup>f</sup>                                             | 1.67 (0.47-5.88)   | 1 (reference) | 0.90 (0.41-1.97) | 1.34 (0.69-2.57)  | 1.52 (0.78-2.98)  | 0.44 |
| MV, HR (95% CI) <sup>c</sup>                                             | 1.66 (0.47-5.86)   | 1 (reference) | 0.90 (0.41-1.98) | 1.34 (0.70-2.58)  | 1.52 (0.78-2.98)  | 0.44 |
| MV+BMI at 20 age, HR (95% CI) <sup>g</sup>                               | 1.39 (0.38-5.08)   | 1 (reference) | 0.93 (0.42-2.05) | 1.41 (0.73-2.73)  | 1.63 (0.82-3.22)  | 0.29 |
| Weight change across the adult life course (age 50y to study enrollment) |                    |               |                  |                   |                   |      |
| No. of cases/person-years                                                | 8/117,331          | 54/1,035,174  | 16/345,663       | 9/219,455         | 3/60,960          |      |
| Median (IQR)                                                             | -9.1 (-12.7-6.8)   | 1.8 (0.0-3.6) | 6.8 (6.8-9.1)    | 13.6 (11.4-15.9)  | 25.0 (21.8-29.5)  |      |
| Age-adjusted HR (95% CI)                                                 | 1.23 (0.58-2.58)   | 1 (reference) | 0.83 (0.48-1.46) | 0.71 (0.35-1.45)  | 0.84 (0.26-2.70)  | 0.39 |
| MV, HR (95% CI) <sup>f</sup>                                             | 1.12 (0.52-2.38)   | 1 (reference) | 0.83 (0.47-1.46) | 0.70 (0.34-1.44)  | 0.82 (0.25-2.68)  | 0.49 |
| MV, HR (95% CI) <sup>c</sup>                                             | 1.12 (0.52-2.38)   | 1 (reference) | 0.83 (0.47-1.46) | 0.70 (0.34-1.43)  | 0.81 (0.25-2.66)  | 0.48 |
| MV+BMI at 20 age, HR (95% CI) <sup>g</sup>                               | 1.07 (0.50-2.30)   | 1 (reference) | 0.84 (0.48-1.47) | 0.70 (0.34-1.44)  | 0.81 (0.25-2.65)  | 0.54 |

<sup>a</sup>Models were adjusted for age, sex, center, race and ethnicity, randomization arm, education, job status, aspirin use more than 12 months, smoking status, and family history of liver cancer. BMI = body mass index; CI = confidence interval; HR = hazard ratio; IQR = interquartile range; MV = multivariable model.

<sup>b</sup>Models were adjusted for age, sex, center, race and ethnicity, randomization arm, education, job status, aspirin use more than 12 months, smoking status, diabetes mellitus, hypertension, diverticulitis, liver cirrhosis, family history of liver cancer, the Healthy Eating Index-2010 scores, and alcohol.

<sup>c</sup>Models were adjusted for age, sex, center, race and ethnicity, randomization arm, education, job status, aspirin use more than 12 months, smoking status, diabetes mellitus, hypertension, diverticulitis, liver cirrhosis, gallbladder stones or inflammation, the Healthy Eating Index-2010 scores, and alcohol.

<sup>d</sup>Models in liver cancer were further adjusted for the BMI at 20 ages.

<sup>e</sup>Models were adjusted for age, sex, center, race and ethnicity, randomization arm, education, job status, aspirin use more than 12 months, smoking status, and family history of biliary tract cancer.

<sup>f</sup>Models were adjusted for age, sex, center, race and ethnicity, randomization arm, education, job status, aspirin use more than 12 months, smoking status, diabetes mellitus, hypertension, liver cirrhosis, gallbladder stones or inflammation, and family history of biliary tract cancer, the Healthy Eating Index-2010 scores, and alcohol.

<sup>g</sup>Models in biliary tract cancer were further adjusted for the BMI at 20 ages.

<sup>h</sup>P values for trend were calculated using continuous BMI exposure variables.



**Supplementary Table 5.** Hazard ratios and 95% confidence intervals for incident liver and biliary tract cancers according to weight change in a sub-cohort with available dietary data in the Prostate, Lung, Colorectal and Ovarian (PLCO) Cancer Screening Trial

| Model                                                                    | Loss<br>≤-5 kg       | Stable weight<br>-5 to < 5 kg | Gain<br>5 to < 10 kg | Gain<br>10 to < 20 kg | Gain<br>≥20 kg      | <i>P</i> <sub>trend</sub> <sup>f</sup> |
|--------------------------------------------------------------------------|----------------------|-------------------------------|----------------------|-----------------------|---------------------|----------------------------------------|
| <b>Liver cancer</b>                                                      |                      |                               |                      |                       |                     |                                        |
| Weight change during early-to-mid adulthood (age 20 to 50y)              |                      |                               |                      |                       |                     |                                        |
| No. of cases/person-years                                                | 2/37,928             | 18/494,710                    | 17/452,634           | 29/528,132            | 25/263,876          | -                                      |
| Median (IQR)                                                             | -9.08 (-12.71,-6.81) | 2.27 (0.00,4.54)              | 7.72 (6.81,9.08)     | 13.62 (11.35,15.89)   | 24.97 (22.70,31.78) | -                                      |
| Age-adjusted HR (95% CI)                                                 | 1.58 (0.37-6.79)     | 1 (reference)                 | 1.06 (0.55-2.05)     | 1.63 (0.90-2.93)      | 3.16 (1.71-5.83)    | <0.001                                 |
| MV, HR (95% CI) <sup>a</sup>                                             | 1.23 (0.28-5.32)     | 1 (reference)                 | 0.98 (0.50-1.90)     | 1.29 (0.70-2.35)      | 1.95 (1.02-3.73)    | 0.90                                   |
| MV, HR (95% CI) <sup>b</sup>                                             | 1.26 (0.29-5.49)     | 1 (reference)                 | 0.97 (0.50-1.88)     | 1.28 (0.70-2.33)      | 1.90 (0.99-3.64)    | 0.11                                   |
| MV+BMI at 20 age, HR (95% CI) <sup>c</sup>                               | 1.06 (0.24-4.77)     | 1 (reference)                 | 1.00 (0.51-1.95)     | 1.35 (0.73-2.48)      | 2.06 (1.06-3.98)    | 0.06                                   |
| Weight change across the adult life course (age 20y to study enrollment) |                      |                               |                      |                       |                     |                                        |
| No. of cases/person-years                                                | 2/40,764             | 15/315,121                    | 12/327,298           | 37/577,950            | 25/516,218          | -                                      |
| Median (IQR)                                                             | -9.08 (-12.26,-6.81) | 2.27 (0.00,4.09)              | 7.72 (6.81,9.08)     | 14.53 (12.26,17.25)   | 27.24 (22.70,34.05) | -                                      |
| Age-adjusted HR (95% CI)                                                 | 1.03 (0.24-4.52)     | 1 (reference)                 | 0.78 (0.37-1.67)     | 1.38 (0.76-2.51)      | 1.07 (0.57-2.04)    | 0.45                                   |
| MV, HR (95% CI) <sup>a</sup>                                             | 0.85 (0.19-3.73)     | 1 (reference)                 | 0.78 (0.36-1.66)     | 1.24 (0.67-2.27)      | 0.83 (0.43-1.62)    | 0.83                                   |
| MV, HR (95% CI) <sup>b</sup>                                             | 0.88 (0.20-3.85)     | 1 (reference)                 | 0.76 (0.36-1.63)     | 1.21 (0.66-2.23)      | 0.81 (0.42-1.58)    | 0.76                                   |
| MV+BMI at 20 age, HR (95% CI) <sup>c</sup>                               | 0.79 (0.18-3.57)     | 1 (reference)                 | 0.79 (0.37-1.69)     | 1.27 (0.69-2.35)      | 0.86 (0.44-1.71)    | 0.94                                   |
| Weight change across the adult life course (age 50y to study enrollment) |                      |                               |                      |                       |                     |                                        |
| No. of cases/person-years                                                | 13/117,126           | 51/1,034,547                  | 18/345,454           | 9/219,266             | 0/60,888            | -                                      |
| Median (IQR)                                                             | -9.08 (-12.71,-6.81) | 1.82 (0.00,3.63)              | 6.81 (6.81,9.08)     | 13.62 (11.35,15.89)   | 24.74 (22.25,29.51) | -                                      |
| Age-adjusted HR (95% CI)                                                 | 2.15 (1.17-3.95)     | 1 (reference)                 | 0.99 (0.58-1.69)     | 0.76 (0.37-1.54)      | -                   | 0.001                                  |
| MV, HR (95% CI) <sup>a</sup>                                             | 1.39 (0.74-2.62)     | 1 (reference)                 | 1.01 (0.58-1.73)     | 0.73 (0.35-1.49)      | -                   | 0.02                                   |
| MV, HR (95% CI) <sup>b</sup>                                             | 1.39 (0.74-2.62)     | 1 (reference)                 | 1.01 (0.59-1.74)     | 0.72 (0.35-1.49)      | -                   | 0.02                                   |
| MV+BMI at 20 age, HR (95% CI) <sup>c</sup>                               | 1.38 (0.73-2.60)     | 1 (reference)                 | 1.01 (0.59-1.74)     | 0.73 (0.35-1.50)      | -                   | 0.02                                   |
| <b>Biliary tract cancer</b>                                              |                      |                               |                      |                       |                     |                                        |
| Weight change during early-to-mid adulthood (age 20 to 50y)              |                      |                               |                      |                       |                     |                                        |
| No. of cases/person-years                                                | 1/37,928             | 18/494,710                    | 29/452,634           | 21/528,132            | 14/263,876          | -                                      |
| Median (IQR)                                                             | -9.08 (-12.71,-6.81) | 2.27 (0.00,4.54)              | 7.72 (6.81,9.08)     | 13.62 (11.35,15.89)   | 24.97 (22.70,31.78) | -                                      |
| Age-adjusted HR (95% CI)                                                 | 0.76 (0.10-5.72)     | 1 (reference)                 | 1.78 (0.99-3.21)     | 1.14 (0.61-2.15)      | 1.65 (0.81-3.33)    | 0.58                                   |

|                                                                          |                      |                  |                  |                     |                     |       |
|--------------------------------------------------------------------------|----------------------|------------------|------------------|---------------------|---------------------|-------|
| MV, HR (95% CI) <sup>d</sup>                                             | 0.70 (0.09-5.25)     | 1 (reference)    | 1.75 (0.97-3.17) | 1.12 (0.59-2.13)    | 1.64 (0.79-3.42)    | 0.59  |
| MV, HR (95% CI) <sup>b</sup>                                             | 0.71 (0.09-5.32)     | 1 (reference)    | 1.74 (0.96-3.14) | 1.11 (0.58-2.11)    | 1.61 (0.77-3.34)    | 0.63  |
| MV+BMI at 20 age, HR (95% CI) <sup>e</sup>                               | 0.56 (0.07-4.40)     | 1 (reference)    | 1.81 (1.00-3.28) | 1.19 (0.62-2.27)    | 1.74 (0.83-3.65)    | 0.45  |
| Weight change across the adult life course (age 20y to study enrollment) |                      |                  |                  |                     |                     |       |
| No. of cases/person-years                                                | 3/40,764             | 12/315,121       | 11/327,298       | 31/577,950          | 26/516,218          | -     |
| Median (IQR)                                                             | -9.08 (-12.26,-6.81) | 2.27 (0.00,4.09) | 7.72 (6.81,9.08) | 14.53 (12.26,17.25) | 27.24 (22.70,34.05) | -     |
| Age-adjusted HR (95% CI)                                                 | 1.91 (0.54-6.77)     | 1 (reference)    | 0.89 (0.39-2.03) | 1.43 (0.73-2.78)    | 1.36 (0.68-2.69)    | 0.001 |
| MV, HR (95% CI) <sup>d</sup>                                             | 1.79 (0.50-6.36)     | 1 (reference)    | 0.90 (0.40-2.04) | 1.46 (0.74-2.86)    | 1.40 (0.69-2.86)    | 0.97  |
| MV, HR (95% CI) <sup>b</sup>                                             | 1.82 (0.51-6.47)     | 1 (reference)    | 0.89 (0.39-2.01) | 1.44 (0.74-2.83)    | 1.38 (0.68-2.81)    | 0.97  |
| MV+BMI at 20 age, HR (95% CI) <sup>e</sup>                               | 1.57 (0.42-5.80)     | 1 (reference)    | 0.92 (0.41-2.10) | 1.52 (0.77-3.00)    | 1.48 (0.72-3.03)    | 0.82  |
| Weight change across the adult life course (age 50y to study enrollment) |                      |                  |                  |                     |                     |       |
| No. of cases/person-years                                                | 7/117,126            | 50/1,034,547     | 14/345,454       | 9/219,266           | 3/60,888            |       |
| Median (IQR)                                                             | -9.08 (-12.71,-6.81) | 1.82 (0.00,3.63) | 6.81 (6.81,9.08) | 13.62 (11.35,15.89) | 24.74 (22.25,29.51) |       |
| Age-adjusted HR (95% CI)                                                 | 1.16 (0.53-2.56)     | 1 (reference)    | 0.78 (0.43-1.42) | 0.77 (0.38-1.56)    | 0.90 (0.28-2.90)    | 0.48  |
| MV, HR (95% CI) <sup>d</sup>                                             | 1.08 (0.48-2.42)     | 1 (reference)    | 0.78 (0.43-1.42) | 0.75 (0.36-1.55)    | 0.89 (0.27-2.93)    | 0.55  |
| MV, HR (95% CI) <sup>b</sup>                                             | 1.08 (0.48-2.42)     | 1 (reference)    | 0.78 (0.43-1.42) | 0.75 (0.36-1.54)    | 0.89 (0.27-2.90)    | 0.54  |
| MV+BMI at 20 age, HR (95% CI) <sup>e</sup>                               | 1.05 (0.47-2.36)     | 1 (reference)    | 0.79 (0.43-1.43) | 0.75 (0.36-1.55)    | 0.89 (0.27-2.91)    | 0.59  |

<sup>a</sup>Models were adjusted for age, sex, center, race and ethnicity, randomization arm, education, job status, aspirin use more than 12 months, smoking status, diabetes mellitus, hypertension, diverticulitis, liver cirrhosis, family history of liver cancer, the Healthy Eating Index-2010 scores, and alcohol. BMI = body mass index; CI = confidence interval; HR = hazard ratio; IQR = interquartile range; MV = multivariable model.

<sup>b</sup>Models were adjusted for age, sex, center, race and ethnicity, randomization arm, education, job status, aspirin use more than 12 months, smoking status, diabetes mellitus, hypertension, diverticulitis, liver cirrhosis, gallbladder stones or inflammation, the Healthy Eating Index-2010 scores, and alcohol.

<sup>c</sup>Models in liver cancer were further adjusted for the BMI at 20 ages.

<sup>d</sup>Models were adjusted for age, sex, center, race and ethnicity, randomization arm, education, job status, aspirin use more than 12 months, smoking status, diabetes mellitus, hypertension, liver cirrhosis, gallbladder stones or inflammation, and family history of biliary tract cancer, the Healthy Eating Index-2010 scores, and alcohol.

<sup>e</sup>Models in biliary tract cancer were further adjusted for the BMI at 20 ages.

<sup>f</sup>P values for trend were calculated using continuous BMI exposure variables.

**Supplementary Table 6.** Hazard ratios and 95% confidence intervals for incident liver and biliary tract cancers according to body mass index trajectories across adulthood in a sub-cohort with available dietary data in the Prostate, Lung, Colorectal and Ovarian (PLCO) Cancer Screening Trial

| BMI trajectories        | Liver cancer                  |                          |                          | Biliary tract cancer          |                          |                          |
|-------------------------|-------------------------------|--------------------------|--------------------------|-------------------------------|--------------------------|--------------------------|
|                         | No. of cases/<br>Person-years | HR (95% CI) <sup>a</sup> | HR (95% CI) <sup>b</sup> | No. of cases/<br>Person-years | HR (95% CI) <sup>b</sup> | HR (95% CI) <sup>b</sup> |
| Stable normal           | 18/485,387                    | 1 (reference)            | 1 (reference)            | 14/485,387                    | 1 (reference)            | 1 (reference)            |
| Normal to<br>overweight | 47/901,870                    | 1.09 (0.62-<br>1.91)     | 1.07 (0.61-<br>1.87)     | 52/901,870                    | 2.10 (1.15-<br>3.86)     | 2.10 (1.14-3.86)         |
| Overweight to obese     | 4/75,594                      | 1.01 (0.32-<br>3.10)     | 0.99 (0.32-<br>3.08)     | 5/75,594                      | 2.85 (0.98-<br>8.29)     | 2.85 (0.98-8.31)         |
| Normal to obese         | 28/315,732                    | 1.71 (0.91-<br>3.24)     | 1.70 (0.89-<br>3.22)     | 19/315,732                    | 2.40 (1.16-<br>4.98)     | 2.39 (1.16-4.95)         |

<sup>a</sup>Models were adjusted for age, sex, center, race and ethnicity, randomization arm, education, job status, aspirin use more than 12 months, smoking status, diabetes mellitus, hypertension, diverticulitis, liver cirrhosis, family history of liver cancer, the Healthy Eating Index-2010 scores, and alcohol. BMI = body mass index; CI = confidence interval; HR = hazard ratio.

<sup>b</sup>Models were adjusted for age, sex, center, race and ethnicity, randomization arm, education, job status, aspirin use more than 12 months, smoking status, diabetes mellitus, hypertension, diverticulitis, liver cirrhosis, gallbladder stones or inflammation, the Healthy Eating Index-2010 scores, and alcohol.

<sup>c</sup>Models were adjusted for age, sex, center, race and ethnicity, randomization arm, job status, aspirin use more than 12 months, smoking status, diabetes mellitus, hypertension, liver cirrhosis, gallbladder stones or inflammation, and family history of biliary tract cancer, the Healthy Eating Index-2010 scores, and alcohol.

Note: underweight, BMI <18.4 kg/m<sup>2</sup>; normal weight, BMI 18.5-< 24.9 kg/m<sup>2</sup>; overweight, BMI 25-< 29.9 kg/m<sup>2</sup>; obese, BMI ≥30 kg/m<sup>2</sup>.
